# Supplementary material for: A Genome-Wide Association Study Reveals a Quantitative Trait Locus of Adiponectin on CDH13 That Predicts Cardiometabolic Outcomes
Source: PubMed Central journal article supplement — Diabetes. 2011 Aug 20;60(9):2417–23. doi: 10.2337/db10-1321 (PMC3161336; doi:10.2337/db10-1321), 2011-08-20

SUPPLEMENTARY DATA

**Supplementary Table 1.** Baseline characteristics of samples in the CVDFACTS cohort study.

|                         | Male (n = 1525) | Female (n = 1825) | P value <sup>†</sup> |
|-------------------------|-----------------|-------------------|----------------------|
| Age, Year               | 51.52±12.54     | 49.17±11.99       | <0.001               |
| BMI, Kg/m <sup>2</sup>  | 24.02±3.07      | 24.49±3.44        | <0.001               |
| Waist circumference, cm | 84.49±8.91      | 78±8.7            | <0.001               |
| Triglycerides, mg/dl    | 119.47±82.34    | 103.07±79.52      | <0.001               |
| Cholesterol, mg/dl      | 196.23±43.73    | 199.51±44.53      | 0.059                |
| HDL-C, mg/dl            | 41.91±16.3      | 44.11±12.9        | 0.001                |
| LDL-C, mg/dl            | 126.61±46.63    | 130.75±38.19      | 0.037                |
| Systolic BP, mm/Hg      | 122.15±17.19    | 118.39±18.63      | <0.001               |
| Diastolic BP, mm/Hg     | 75.94±11.45     | 71.09±11.14       | <0.001               |
| Glucose, mg/dl          | 102.34±26.58    | 100.25±24.68      | 0.02                 |
| IMT, mm                 | 0.51±0.14       | 0.5±0.15          | 0.002                |
| Smoking, n (%)          | 594(38.9)       | 14(0.8)           | <0.001               |
| Hypertension, n (%)     | 171(11.3)       | 218(12)           | 0.511                |
| DM, n (%)               | 41(2.7)         | 50(2.75)          | 0.929                |
| MS, n (%)               | 327(21.5)       | 421(23.2)         | 0.262                |
| Stroke, n (%)           | 42(2.8)         | 38(2.1)           | 0.204                |

Data are mean±SD; BMI, body mass index; HDL-C, high-density lipoprotein cholesterol; LDL-C, low-density lipoprotein cholesterol; IMT, intima medial thickness; DM, diabetes mellitus; MS, metabolic syndrome.

<sup>†</sup>Either *t*-test or chi-square was used to make comparisons between the male and female of CVDFACTS cohort study with a significance level set at  $p = 0.05$ .

## SUPPLEMENTARY DATA

**Supplementary Figure 1.** Multidimensional scaling (MDS) analysis plot. The MDS plot shows the first two principal components, estimated by PLINK, based on genotype data from 509,174 SNPs. No population stratification for YOH cases in the first stage was detected (Identify-by-state group-difference empirical p value = 0.99715 for T4: Case/case more similar).

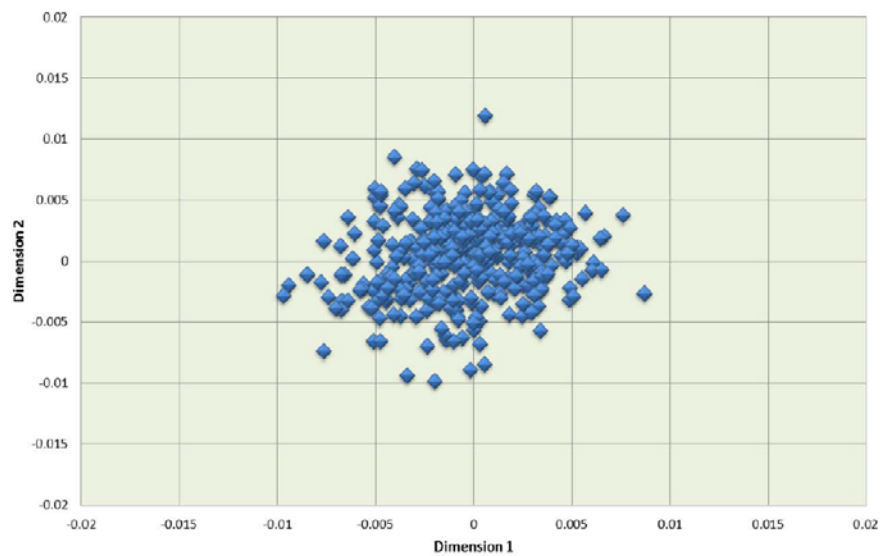

SUPPLEMENTARY DATA

**Supplementary Figure 2.** Q–Q plot of genome-wide QTL mapping for adiponectin levels. Q–Q plots are shown for the GLM for associating adiponectin levels with genotype data, making adjustments for gender, age, BMI and smoking status in the first-stage. The light blue area represents the upper and lower boundaries of the 95% confidence interval. The observed genomic control inflation factor( $\lambda_{GC}$ ) was 0.9962.

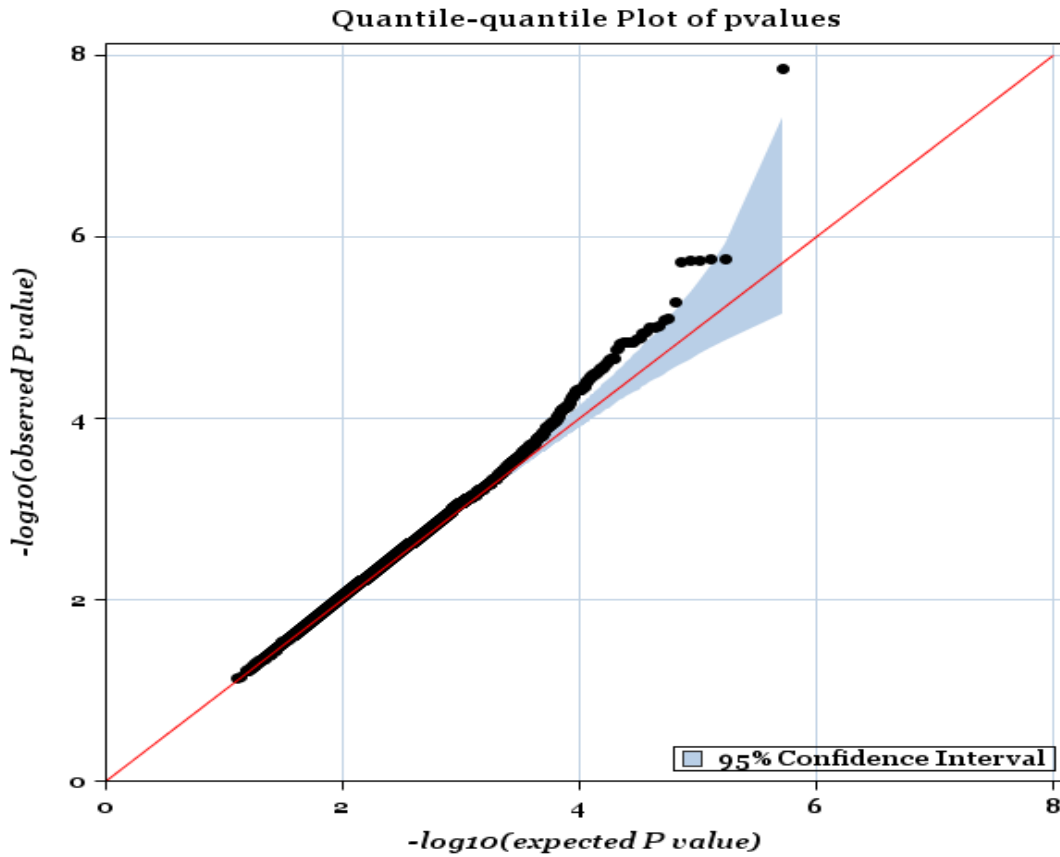

SUPPLEMENTARY DATA

**Supplementary Figure 3.** Cluster plots for the 3 SNPs showing the strongest evidence of association with adiponectin levels.

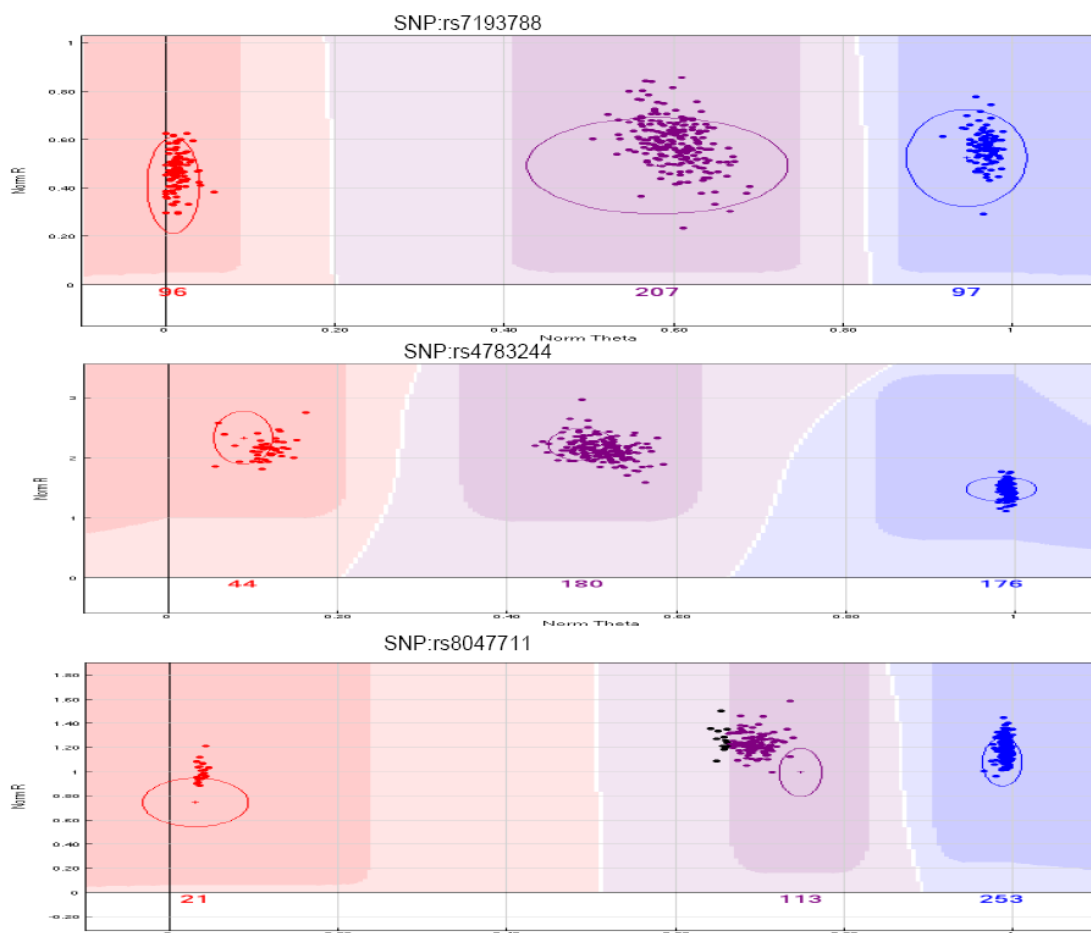

Supplement: supp_db10-1321_DB101321SupplementaryData.pdf [file supp_db10-1321_DB101321SupplementaryData.pdf]
